# Supplementary material for: Collection of cell-free DNA for genomic analysis of solid tumors in a clinical laboratory setting
Source: PLoS One. 2017 Apr 27;12(4):e0176241. doi: 10.1371/journal.pone.0176241 (PMC5407747; doi:10.1371/journal.pone.0176241)
Supplement: S1 Table — (XLSX) [file pone.0176241.s004.xlsx]

## Sheet: Supplemental table 1
Table 1. cfDNA yields from 84 healthy donors collected in K2 EDTA tubes
Subject #	[cfDNA] ng/mL plasma
1	7.05
2	5.85
3	7.89
4	4.29
5	7.8
6	8.1
7	9.6
8	8.6
9	18
10	2.945
11	4.605
12	3.4
13	4.22
14	4.66
15	2.74
16	5.14
17	4.785
18	4.749
19	5.22
20	3.49
21	4.395
22	13.4
23	9.07
24	9.09
25	3.48
26	7.2
27	4.857
28	5.937
29	6.7
30	2.78
31	4.536
32	5.049
33	9.84
34	4.14
35	12.1
36	7.2
37	4.8
38	2.655
39	3.105
40	2.655
41	2.685
42	2.865
43	5.31
44	4.875
45	3.24
46	7.92
47	14.8
48	9.345
49	7.98
50	12.945
51	10.575
52	12.645
53	9.285
54	12.465
55	6.885
56	7.53
57	6.585
58	6.81
59	8.055
60	4.53
61	13.2
62	5.28
63	6.09
64	6.195
65	7.32
66	6.075
67	7.8
68	6.03
69	11.655
70	7.57895
71	4.73684
72	4.73684
73	2.175
74	8.445
75	2.895
76	6.855
77	4.89
78	5.475
79	2.235
80	4.14
81	5.64
82	4.035
83	3
84	10.32
